# Supplementary material for: The Feeding Landscape: Bird and Human Use of Food Resources across a Biocultural Landscape of the Colombian Andes
Source: MDPI journal article supplement (doi:10.3390/su14084789), 2022-04-16
Supplement: s1 [file s1]

**Table S1.** Estimated richness of food resources produced by farmers of Jardín in a) coffee-banana plantations, b) gardens, and c) grazing lands. We depict the number of sampling units (sample size), the method (interpolated, observed, or extrapolated), the diversity order, the diversity estimate of order  $q$  ( $qD$ ), the 95% (default) lower and upper confidence limits of diversity ( $qD.LCL$ ,  $qD.UCL$ ), and the sample coverage estimate ( $SC$ ) along with the 95% (default) lower and upper confidence limits of sample coverage ( $SC.LCL$ ,  $SC.UCL$ ).

| a) Coffee-banana plantations |              |       |       |          |                  |                  |                  |
|------------------------------|--------------|-------|-------|----------|------------------|------------------|------------------|
| Number of sampling units     | method       | order | $qD$  | $qD.LCL$ | $qD.UCL$<br>$SC$ | $SC.LCL$<br>$CL$ | $SC.UCL$<br>$CL$ |
| 1                            | interpolated | 0     | 2.76  | 2.312    | 3.208 0.552      | 0.435            | 0.669            |
| 2                            | interpolated | 0     | 3.997 | 3.471    | 4.523 0.733      | 0.641            | 0.825            |
| 3                            | interpolated | 0     | 4.734 | 4.065    | 5.403 0.799      | 0.726            | 0.872            |
| 4                            | interpolated | 0     | 5.289 | 4.459    | 6.119 0.828      | 0.765            | 0.892            |
| 6                            | interpolated | 0     | 6.193 | 5.045    | 7.340 0.855      | 0.799            | 0.911            |
| 7                            | interpolated | 0     | 6.593 | 5.292    | 7.894 0.862      | 0.808            | 0.916            |
| 8                            | interpolated | 0     | 6.973 | 5.522    | 8.423 0.868      | 0.816            | 0.921            |
| 9                            | interpolated | 0     | 7.336 | 5.74     | 8.932 0.873      | 0.822            | 0.924            |
| 11                           | interpolated | 0     | 8.026 | 6.149    | 9.904 0.880      | 0.83             | 0.93             |
| 12                           | interpolated | 0     | 8.356 | 6.343    | 10.370 0.883     | 0.834            | 0.933            |
| 13                           | interpolated | 0     | 8.678 | 6.53     | 10.826 0.886     | 0.836            | 0.936            |
| 15                           | interpolated | 0     | 9.3   | 6.888    | 11.711 0.891     | 0.841            | 0.942            |
| 16                           | interpolated | 0     | 9.6   | 7.058    | 12.141 0.894     | 0.843            | 0.945            |
| 17                           | interpolated | 0     | 9.893 | 7.222    | 12.564 0.896     | 0.845            | 0.947            |
| 18                           | interpolated | 0     | 10.18 | 7.38     | 12.980 0.899     | 0.847            | 0.95             |
| 20                           | interpolated | 0     | 10.73 | 7.675    | 13.792 0.903     | 0.85             | 0.957            |
|                              |              |       | 3     |          |                  |                  |                  |
| 21                           | interpolated | 0     | 11    | 7.812    | 14.188 0.906     | 0.852            | 0.96             |
| 22                           | interpolated | 0     | 11.26 | 7.941    | 14.579 0.908     | 0.854            | 0.963            |
| 24                           | interpolated | 0     | 11.76 | 8.178    | 15.342 0.913     | 0.857            | 0.969            |
| 25                           | observed     | 0     | 12    | 8.285    | 15.715 0.915     | 0.859            | 0.972            |
| 26                           | extrapolated | 0     | 12.23 | 8.385    | 16.082 0.918     | 0.86             | 0.975            |
|                              |              |       | 4     |          |                  |                  |                  |
| 27                           | extrapolated | 0     | 12.46 | 8.476    | 16.445 0.920     | 0.862            | 0.978            |
|                              |              |       | 1     |          |                  |                  |                  |
| 28                           | extrapolated | 0     | 12.68 | 8.561    | 16.802 0.922     | 0.864            | 0.98             |
|                              |              |       | 2     |          |                  |                  |                  |
| 29                           | extrapolated | 0     | 12.89 | 8.639    | 17.155 0.924     | 0.866            | 0.982            |
|                              |              |       | 7     |          |                  |                  |                  |
| 31                           | extrapolated | 0     | 13.31 | 8.774    | 17.846 0.928     | 0.87             | 0.987            |
| 32                           | extrapolated | 0     | 13.50 | 8.832    | 18.184 0.930     | 0.871            | 0.989            |
|                              |              |       | 8     |          |                  |                  |                  |
| 33                           | extrapolated | 0     | 13.70 | 8.883    | 18.518 0.932     | 0.873            | 0.991            |
|                              |              |       | 1     |          |                  |                  |                  |

|    |              |   |            |       |        |       |       |       |
|----|--------------|---|------------|-------|--------|-------|-------|-------|
| 34 | extrapolated | 0 | 13.88<br>8 | 8.929 | 18.847 | 0.934 | 0.875 | 0.993 |
| 36 | extrapolated | 0 | 14.24<br>8 | 9.004 | 19.492 | 0.937 | 0.879 | 0.996 |
| 37 | extrapolated | 0 | 14.42<br>1 | 9.034 | 19.808 | 0.939 | 0.88  | 0.998 |
| 38 | extrapolated | 0 | 14.58<br>9 | 9.058 | 20.120 | 0.941 | 0.882 | 0.999 |
| 39 | extrapolated | 0 | 14.75<br>3 | 9.078 | 20.427 | 0.942 | 0.884 | 1     |
| 41 | extrapolated | 0 | 15.06<br>7 | 9.104 | 21.029 | 0.945 | 0.887 | 1     |
| 42 | extrapolated | 0 | 15.21<br>7 | 9.11  | 21.324 | 0.947 | 0.889 | 1     |
| 43 | extrapolated | 0 | 15.36<br>4 | 9.113 | 21.614 | 0.948 | 0.891 | 1     |
| 44 | extrapolated | 0 | 15.50<br>6 | 9.112 | 21.901 | 0.950 | 0.892 | 1     |
| 46 | extrapolated | 0 | 15.78      | 9.098 | 22.462 | 0.952 | 0.895 | 1     |
| 47 | extrapolated | 0 | 15.91<br>1 | 9.087 | 22.736 | 0.954 | 0.897 | 1     |
| 48 | extrapolated | 0 | 16.03<br>9 | 9.072 | 23.007 | 0.955 | 0.899 | 1     |
| 50 | extrapolated | 0 | 16.28<br>5 | 9.033 | 23.536 | 0.957 | 0.902 | 1     |

**b) Gardens**

| Number of sampling<br>units | method       | order | qD    | qD.LCL | qD.UCL<br>SC | SC.L<br>CL | SC.U<br>CL |       |
|-----------------------------|--------------|-------|-------|--------|--------------|------------|------------|-------|
| 1                           | interpolated | 0     | 4.444 | 3.65   | 5.239        | 0.153      | 0.106      | 0.2   |
| 2                           | interpolated | 0     | 8.208 | 6.853  | 9.563        | 0.275      | 0.206      | 0.344 |
| 3                           | interpolated | 0     | 11.43 | 9.64   | 13.221       | 0.372      | 0.294      | 0.45  |
|                             |              |       | 1     |        |              |            |            |       |
| 5                           | interpolated | 0     | 16.66 | 14.188 | 19.150       | 0.512      | 0.434      | 0.591 |
|                             |              |       | 9     |        |              |            |            |       |
| 6                           | interpolated | 0     | 18.83 | 16.063 | 21.612       | 0.563      | 0.487      | 0.639 |
|                             |              |       | 8     |        |              |            |            |       |
| 7                           | interpolated | 0     | 20.77 | 17.735 | 23.824       | 0.605      | 0.532      | 0.678 |
|                             |              |       | 9     |        |              |            |            |       |
| 9                           | interpolated | 0     | 24.13 | 20.607 | 27.667       | 0.669      | 0.602      | 0.735 |
|                             |              |       | 7     |        |              |            |            |       |
| 10                          | interpolated | 0     | 25.61 | 21.86  | 29.359       | 0.693      | 0.63       | 0.757 |
| 12                          | interpolated | 0     | 28.24 | 24.091 | 32.389       | 0.733      | 0.675      | 0.791 |
| 13                          | interpolated | 0     | 29.42 | 25.095 | 33.758       | 0.749      | 0.694      | 0.805 |
|                             |              |       | 6     |        |              |            |            |       |
| 14                          | interpolated | 0     | 30.54 | 26.037 | 35.044       | 0.764      | 0.71       | 0.817 |

|    |              |   |            |        |        |       |       |       |
|----|--------------|---|------------|--------|--------|-------|-------|-------|
| 16 | interpolated | 0 | 32.58<br>5 | 27.766 | 37.404 | 0.788 | 0.737 | 0.838 |
| 17 | interpolated | 0 | 33.52<br>8 | 28.563 | 38.492 | 0.798 | 0.749 | 0.848 |
| 19 | interpolated | 0 | 35.28      | 30.045 | 40.515 | 0.816 | 0.768 | 0.864 |
| 20 | interpolated | 0 | 36.09<br>7 | 30.736 | 41.459 | 0.824 | 0.776 | 0.872 |
| 21 | interpolated | 0 | 36.88      | 31.396 | 42.365 | 0.831 | 0.783 | 0.879 |
| 23 | interpolated | 0 | 38.35<br>4 | 32.632 | 44.075 | 0.843 | 0.795 | 0.892 |
| 24 | interpolated | 0 | 39.04<br>9 | 33.212 | 44.886 | 0.849 | 0.8   | 0.898 |
| 26 | interpolated | 0 | 40.37      | 34.3   | 46.440 | 0.858 | 0.807 | 0.909 |
| 27 | observed     | 0 | 41         | 34.812 | 47.188 | 0.863 | 0.811 | 0.915 |
| 28 | extrapolated | 0 | 41.61      | 35.301 | 47.920 | 0.867 | 0.814 | 0.92  |
| 29 | extrapolated | 0 | 42.20<br>2 | 35.769 | 48.635 | 0.871 | 0.817 | 0.925 |
| 30 | extrapolated | 0 | 42.77<br>5 | 36.215 | 49.335 | 0.875 | 0.82  | 0.929 |
| 32 | extrapolated | 0 | 43.87      | 37.045 | 50.694 | 0.883 | 0.827 | 0.938 |
| 33 | extrapolated | 0 | 44.39<br>2 | 37.429 | 51.355 | 0.886 | 0.83  | 0.942 |
| 34 | extrapolated | 0 | 44.89<br>8 | 37.794 | 52.003 | 0.890 | 0.833 | 0.946 |
| 36 | extrapolated | 0 | 45.86<br>4 | 38.465 | 53.263 | 0.896 | 0.839 | 0.953 |
| 37 | extrapolated | 0 | 46.32<br>5 | 38.773 | 53.877 | 0.899 | 0.842 | 0.957 |
| 38 | extrapolated | 0 | 46.77<br>2 | 39.064 | 54.480 | 0.903 | 0.845 | 0.96  |
| 40 | extrapolated | 0 | 47.62<br>5 | 39.596 | 55.654 | 0.908 | 0.851 | 0.965 |
| 41 | extrapolated | 0 | 48.03<br>2 | 39.838 | 56.226 | 0.911 | 0.854 | 0.968 |
| 43 | extrapolated | 0 | 48.80<br>9 | 40.278 | 57.339 | 0.917 | 0.86  | 0.973 |
| 44 | extrapolated | 0 | 49.17<br>9 | 40.477 | 57.881 | 0.919 | 0.863 | 0.975 |
| 45 | extrapolated | 0 | 49.53<br>8 | 40.664 | 58.413 | 0.922 | 0.866 | 0.977 |
| 47 | extrapolated | 0 | 50.22<br>4 | 41     | 59.448 | 0.926 | 0.871 | 0.981 |
| 48 | extrapolated | 0 | 50.55<br>1 | 41.15  | 59.952 | 0.929 | 0.874 | 0.983 |
| 49 | extrapolated | 0 | 50.86<br>8 | 41.29  | 60.446 | 0.931 | 0.877 | 0.985 |

|    |              |   |            |        |              |       |       |
|----|--------------|---|------------|--------|--------------|-------|-------|
| 51 | extrapolated | 0 | 51.47<br>3 | 41.54  | 61.406 0.935 | 0.882 | 0.988 |
| 52 | extrapolated | 0 | 51.76<br>2 | 41.651 | 61.873 0.937 | 0.884 | 0.99  |
| 54 | extrapolated | 0 | 52.31<br>3 | 41.847 | 62.779 0.941 | 0.889 | 0.993 |

| c) Grazing lands            |              |       |       |        |              |            |            |
|-----------------------------|--------------|-------|-------|--------|--------------|------------|------------|
| Number of sampling<br>units | method       | order | qD    | qD.LCL | qD.UCL<br>SC | SC.L<br>CL | SC.U<br>CL |
| 1                           | interpolated | 0     | 1     | 0.431  | 1.569 0.200  | 0.053      | 0.347      |
| 1                           | interpolated | 0     | 1     | 0.431  | 1.569 0.200  | 0.053      | 0.347      |
| 2                           | interpolated | 0     | 1.8   | 0.881  | 2.719 0.352  | 0.144      | 0.559      |
| 3                           | interpolated | 0     | 2.448 | 1.293  | 3.604 0.466  | 0.24       | 0.692      |
| 3                           | interpolated | 0     | 2.448 | 1.293  | 3.604 0.466  | 0.24       | 0.692      |
| 4                           | interpolated | 0     | 2.982 | 1.651  | 4.313 0.552  | 0.327      | 0.777      |
| 5                           | interpolated | 0     | 3.431 | 1.957  | 4.904 0.617  | 0.399      | 0.834      |
| 6                           | interpolated | 0     | 3.814 | 2.216  | 5.412 0.666  | 0.458      | 0.873      |
| 6                           | interpolated | 0     | 3.814 | 2.216  | 5.412 0.666  | 0.458      | 0.873      |
| 7                           | interpolated | 0     | 4.148 | 2.435  | 5.861 0.703  | 0.506      | 0.901      |
| 8                           | interpolated | 0     | 4.445 | 2.623  | 6.267 0.733  | 0.544      | 0.922      |
| 8                           | interpolated | 0     | 4.445 | 2.623  | 6.267 0.733  | 0.544      | 0.922      |
| 9                           | interpolated | 0     | 4.712 | 2.783  | 6.641 0.756  | 0.574      | 0.938      |
| 10                          | interpolated | 0     | 4.956 | 2.923  | 6.989 0.774  | 0.597      | 0.95       |
| 11                          | interpolated | 0     | 5.182 | 3.046  | 7.319 0.787  | 0.614      | 0.96       |
| 11                          | interpolated | 0     | 5.182 | 3.046  | 7.319 0.787  | 0.614      | 0.96       |
| 12                          | interpolated | 0     | 5.396 | 3.157  | 7.634 0.796  | 0.624      | 0.967      |
| 13                          | interpolated | 0     | 5.6   | 3.26   | 7.940 0.800  | 0.628      | 0.972      |
| 14                          | interpolated | 0     | 5.8   | 3.359  | 8.241 0.800  | 0.624      | 0.976      |
| 15                          | observed     | 0     | 6     | 3.458  | 8.542 0.813  | 0.643      | 0.984      |
| 16                          | extrapolated | 0     | 6.187 | 3.544  | 8.830 0.826  | 0.662      | 0.989      |
| 16                          | extrapolated | 0     | 6.187 | 3.544  | 8.830 0.826  | 0.662      | 0.989      |
| 17                          | extrapolated | 0     | 6.361 | 3.62   | 9.102 0.837  | 0.681      | 0.994      |
| 18                          | extrapolated | 0     | 6.523 | 3.687  | 9.360 0.848  | 0.698      | 0.999      |
| 18                          | extrapolated | 0     | 6.523 | 3.687  | 9.360 0.848  | 0.698      | 0.999      |
| 19                          | extrapolated | 0     | 6.675 | 3.746  | 9.605 0.858  | 0.714      | 1          |
| 20                          | extrapolated | 0     | 6.817 | 3.797  | 9.837 0.868  | 0.729      | 1          |
| 21                          | extrapolated | 0     | 6.949 | 3.842  | 10.057 0.877 | 0.744      | 1          |
| 21                          | extrapolated | 0     | 6.949 | 3.842  | 10.057 0.877 | 0.744      | 1          |
| 22                          | extrapolated | 0     | 7.073 | 3.88   | 10.265 0.885 | 0.757      | 1          |
| 23                          | extrapolated | 0     | 7.188 | 3.912  | 10.463 0.893 | 0.77       | 1          |
| 24                          | extrapolated | 0     | 7.295 | 3.94   | 10.651 0.900 | 0.782      | 1          |
| 24                          | extrapolated | 0     | 7.295 | 3.94   | 10.651 0.900 | 0.782      | 1          |

|    |              |   |       |       |        |       |       |   |
|----|--------------|---|-------|-------|--------|-------|-------|---|
| 25 | extrapolated | 0 | 7.395 | 3.962 | 10.829 | 0.906 | 0.793 | 1 |
| 26 | extrapolated | 0 | 7.489 | 3.98  | 10.998 | 0.913 | 0.804 | 1 |
| 27 | extrapolated | 0 | 7.577 | 3.995 | 11.158 | 0.918 | 0.814 | 1 |
| 27 | extrapolated | 0 | 7.577 | 3.995 | 11.158 | 0.918 | 0.814 | 1 |
| 28 | extrapolated | 0 | 7.658 | 4.006 | 11.311 | 0.924 | 0.824 | 1 |
| 29 | extrapolated | 0 | 7.734 | 4.013 | 11.455 | 0.929 | 0.833 | 1 |
| 30 | extrapolated | 0 | 7.805 | 4.018 | 11.592 | 0.934 | 0.841 | 1 |

**Table S2.** Estimated richness of bird species in a) forests, b) coffee-banana plantations, c) gardens, d) grazing lands, and e) town. We depict the number of individuals (sample size), the method (interpolated, observed, or extrapolated), the diversity order, the diversity estimate of order q (qD), the 95% (default) lower and upper confidence limits of diversity (qD.LCL, qD.UCL), and the sample coverage estimate (SC) along with the 95% (default) lower and upper confidence limits of sample coverage (SC.LCL, SC.UCL).

| a) Forests            |              |       |        |            |            |       |            |            |
|-----------------------|--------------|-------|--------|------------|------------|-------|------------|------------|
| Number of individuals | method       | order | qD     | qD.LC<br>L | qD.UC<br>L | SC    | SC.LC<br>L | SC.U<br>CL |
| 1                     | interpolated | 0     | 1      | 1          | 1          | 0.051 | 0.025      | 0.077      |
| 5                     | interpolated | 0     | 4.539  | 4.339      | 4.738      | 0.21  | 0.134      | 0.286      |
| 10                    | interpolated | 0     | 8.201  | 7.592      | 8.811      | 0.342 | 0.257      | 0.428      |
| 15                    | interpolated | 0     | 11.297 | 10.276     | 12.318     | 0.432 | 0.353      | 0.511      |
| 20                    | interpolated | 0     | 13.995 | 12.609     | 15.382     | 0.499 | 0.429      | 0.568      |
| 25                    | interpolated | 0     | 16.393 | 14.693     | 18.093     | 0.551 | 0.49       | 0.612      |
| 30                    | interpolated | 0     | 18.549 | 16.581     | 20.517     | 0.594 | 0.541      | 0.648      |
| 35                    | interpolated | 0     | 20.501 | 18.305     | 22.696     | 0.632 | 0.583      | 0.68       |
| 40                    | interpolated | 0     | 22.274 | 19.885     | 24.663     | 0.665 | 0.62       | 0.71       |
| 45                    | interpolated | 0     | 23.888 | 21.333     | 26.442     | 0.695 | 0.652      | 0.738      |
| 50                    | interpolated | 0     | 25.355 | 22.658     | 28.052     | 0.723 | 0.681      | 0.766      |
| 55                    | interpolated | 0     | 26.687 | 23.864     | 29.51      | 0.749 | 0.706      | 0.792      |
| 60                    | interpolated | 0     | 27.894 | 24.957     | 30.83      | 0.773 | 0.729      | 0.817      |
| 65                    | interpolated | 0     | 28.982 | 25.94      | 32.024     | 0.796 | 0.75       | 0.841      |
| 70                    | interpolated | 0     | 29.96  | 26.816     | 33.104     | 0.817 | 0.77       | 0.864      |
| 75                    | interpolated | 0     | 30.833 | 27.588     | 34.079     | 0.837 | 0.788      | 0.886      |
| 80                    | interpolated | 0     | 31.608 | 28.258     | 34.959     | 0.856 | 0.805      | 0.907      |
| 85                    | interpolated | 0     | 32.292 | 28.83      | 35.754     | 0.874 | 0.821      | 0.926      |
| 90                    | interpolated | 0     | 32.89  | 29.308     | 36.472     | 0.89  | 0.835      | 0.945      |
| 91                    | observed     | 0     | 33     | 29.393     | 36.607     | 0.893 | 0.838      | 0.948      |
| 92                    | extrapolated | 0     | 33.107 | 29.474     | 36.74      | 0.896 | 0.84       | 0.952      |
| 96                    | extrapolated | 0     | 33.505 | 29.764     | 37.246     | 0.907 | 0.85       | 0.965      |
| 101                   | extrapolated | 0     | 33.943 | 30.056     | 37.829     | 0.92  | 0.861      | 0.978      |
| 106                   | extrapolated | 0     | 34.322 | 30.279     | 38.366     | 0.93  | 0.871      | 0.99       |
| 110                   | extrapolated | 0     | 34.59  | 30.412     | 38.768     | 0.938 | 0.878      | 0.998      |
| 115                   | extrapolated | 0     | 34.884 | 30.528     | 39.239     | 0.946 | 0.886      | 1.006      |

|     |              |   |        |        |        |       |       |       |
|-----|--------------|---|--------|--------|--------|-------|-------|-------|
| 120 | extrapolated | 0 | 35.138 | 30.597 | 39.68  | 0.953 | 0.893 | 1.013 |
| 125 | extrapolated | 0 | 35.359 | 30.624 | 40.095 | 0.959 | 0.9   | 1.019 |
| 129 | extrapolated | 0 | 35.515 | 30.62  | 40.41  | 0.964 | 0.904 | 1.023 |
| 134 | extrapolated | 0 | 35.686 | 30.587 | 40.785 | 0.969 | 0.91  | 1.027 |
| 139 | extrapolated | 0 | 35.834 | 30.528 | 41.141 | 0.973 | 0.915 | 1.031 |
| 144 | extrapolated | 0 | 35.963 | 30.446 | 41.48  | 0.976 | 0.919 | 1.034 |
| 148 | extrapolated | 0 | 36.054 | 30.368 | 41.739 | 0.979 | 0.923 | 1.035 |
| 153 | extrapolated | 0 | 36.153 | 30.256 | 42.051 | 0.982 | 0.926 | 1.037 |
| 158 | extrapolated | 0 | 36.24  | 30.131 | 42.348 | 0.984 | 0.93  | 1.038 |
| 163 | extrapolated | 0 | 36.314 | 29.995 | 42.634 | 0.986 | 0.933 | 1.04  |
| 167 | extrapolated | 0 | 36.367 | 29.88  | 42.854 | 0.988 | 0.935 | 1.04  |
| 172 | extrapolated | 0 | 36.425 | 29.731 | 43.119 | 0.989 | 0.938 | 1.041 |
| 177 | extrapolated | 0 | 36.475 | 29.576 | 43.374 | 0.991 | 0.941 | 1.041 |
| 182 | extrapolated | 0 | 36.519 | 29.418 | 43.62  | 0.992 | 0.943 | 1.041 |

**b) Coffee-  
banana  
plantations**

| Number of<br>individuals | method       | order | qD     | qD.LC<br>L | qD.UC<br>L | SC    | SC.LC<br>L | SC.U<br>CL |
|--------------------------|--------------|-------|--------|------------|------------|-------|------------|------------|
| 1                        | interpolated | 0     | 1      | 1          | 1          | 0.036 | 0.026      | 0.045      |
| 7                        | interpolated | 0     | 6.31   | 6.153      | 6.466      | 0.216 | 0.173      | 0.259      |
| 14                       | interpolated | 0     | 11.307 | 10.809     | 11.804     | 0.37  | 0.316      | 0.424      |
| 20                       | interpolated | 0     | 14.834 | 14.017     | 15.65      | 0.466 | 0.412      | 0.521      |
| 27                       | interpolated | 0     | 18.303 | 17.132     | 19.473     | 0.55  | 0.498      | 0.602      |
| 33                       | interpolated | 0     | 20.859 | 19.408     | 22.31      | 0.605 | 0.554      | 0.655      |
| 40                       | interpolated | 0     | 23.472 | 21.719     | 25.225     | 0.654 | 0.604      | 0.704      |
| 46                       | interpolated | 0     | 25.462 | 23.465     | 27.459     | 0.687 | 0.637      | 0.737      |
| 53                       | interpolated | 0     | 27.551 | 25.28      | 29.822     | 0.719 | 0.669      | 0.77       |
| 60                       | interpolated | 0     | 29.431 | 26.891     | 31.972     | 0.746 | 0.695      | 0.798      |
| 66                       | interpolated | 0     | 30.902 | 28.131     | 33.672     | 0.766 | 0.714      | 0.818      |
| 73                       | interpolated | 0     | 32.473 | 29.432     | 35.515     | 0.787 | 0.734      | 0.84       |
| 79                       | interpolated | 0     | 33.709 | 30.433     | 36.986     | 0.803 | 0.75       | 0.857      |
| 86                       | interpolated | 0     | 35.034 | 31.48      | 38.588     | 0.82  | 0.766      | 0.875      |
| 92                       | interpolated | 0     | 36.078 | 32.283     | 39.874     | 0.834 | 0.779      | 0.889      |
| 99                       | interpolated | 0     | 37.197 | 33.115     | 41.279     | 0.848 | 0.792      | 0.904      |
| 105                      | interpolated | 0     | 38.078 | 33.746     | 42.41      | 0.86  | 0.803      | 0.917      |
| 112                      | interpolated | 0     | 39.022 | 34.393     | 43.651     | 0.872 | 0.814      | 0.93       |
| 119                      | interpolated | 0     | 39.883 | 34.95      | 44.817     | 0.883 | 0.824      | 0.943      |
| 120                      | observed     | 0     | 40     | 35.023     | 44.977     | 0.885 | 0.825      | 0.945      |
| 121                      | extrapolated | 0     | 40.115 | 35.094     | 45.137     | 0.886 | 0.826      | 0.946      |
| 127                      | extrapolated | 0     | 40.775 | 35.485     | 46.066     | 0.895 | 0.834      | 0.956      |
| 133                      | extrapolated | 0     | 41.385 | 35.82      | 46.951     | 0.903 | 0.841      | 0.965      |

|     |              |   |        |        |        |       |       |       |
|-----|--------------|---|--------|--------|--------|-------|-------|-------|
| 139 | extrapolated | 0 | 41.949 | 36.104 | 47.795 | 0.91  | 0.848 | 0.973 |
| 146 | extrapolated | 0 | 42.553 | 36.375 | 48.732 | 0.918 | 0.856 | 0.981 |
| 152 | extrapolated | 0 | 43.029 | 36.561 | 49.496 | 0.924 | 0.862 | 0.987 |
| 158 | extrapolated | 0 | 43.468 | 36.709 | 50.227 | 0.93  | 0.868 | 0.992 |
| 164 | extrapolated | 0 | 43.875 | 36.823 | 50.926 | 0.935 | 0.874 | 0.997 |
| 171 | extrapolated | 0 | 44.31  | 36.916 | 51.704 | 0.941 | 0.88  | 1.002 |
| 177 | extrapolated | 0 | 44.652 | 36.965 | 52.339 | 0.945 | 0.886 | 1.005 |
| 183 | extrapolated | 0 | 44.969 | 36.991 | 52.947 | 0.95  | 0.891 | 1.008 |
| 189 | extrapolated | 0 | 45.261 | 36.994 | 53.529 | 0.953 | 0.896 | 1.011 |
| 196 | extrapolated | 0 | 45.575 | 36.974 | 54.176 | 0.958 | 0.901 | 1.014 |
| 202 | extrapolated | 0 | 45.822 | 36.938 | 54.706 | 0.961 | 0.905 | 1.016 |
| 208 | extrapolated | 0 | 46.05  | 36.887 | 55.212 | 0.964 | 0.909 | 1.018 |
| 214 | extrapolated | 0 | 46.261 | 36.824 | 55.697 | 0.966 | 0.913 | 1.02  |
| 221 | extrapolated | 0 | 46.487 | 36.735 | 56.238 | 0.969 | 0.917 | 1.021 |
| 227 | extrapolated | 0 | 46.664 | 36.649 | 56.68  | 0.972 | 0.921 | 1.023 |
| 233 | extrapolated | 0 | 46.829 | 36.554 | 57.104 | 0.974 | 0.924 | 1.024 |
| 240 | extrapolated | 0 | 47.005 | 36.433 | 57.576 | 0.976 | 0.928 | 1.025 |

| c) Gardens            | n            |       |        |            |            |       |            |            |
|-----------------------|--------------|-------|--------|------------|------------|-------|------------|------------|
| Number of individuals | method       | order | qD     | qD.LC<br>L | qD.UC<br>L | SC    | SC.LC<br>L | SC.U<br>CL |
| 1                     | interpolated | 0     | 1      | 1          | 1          | 0.039 | 0.026      | 0.052      |
| 6                     | interpolated | 0     | 5.461  | 5.297      | 5.626      | 0.202 | 0.146      | 0.258      |
| 12                    | interpolated | 0     | 9.869  | 9.304      | 10.433     | 0.345 | 0.268      | 0.423      |
| 18                    | interpolated | 0     | 13.521 | 12.471     | 14.57      | 0.449 | 0.364      | 0.535      |
| 24                    | interpolated | 0     | 16.62  | 15.06      | 18.18      | 0.527 | 0.439      | 0.614      |
| 30                    | interpolated | 0     | 19.307 | 17.236     | 21.378     | 0.585 | 0.497      | 0.673      |
| 36                    | interpolated | 0     | 21.679 | 19.106     | 24.251     | 0.63  | 0.544      | 0.716      |
| 42                    | interpolated | 0     | 23.804 | 20.745     | 26.864     | 0.666 | 0.582      | 0.75       |
| 48                    | interpolated | 0     | 25.735 | 22.204     | 29.266     | 0.694 | 0.613      | 0.776      |
| 54                    | interpolated | 0     | 27.511 | 23.524     | 31.497     | 0.717 | 0.638      | 0.796      |
| 60                    | interpolated | 0     | 29.16  | 24.733     | 33.586     | 0.736 | 0.658      | 0.813      |
| 66                    | interpolated | 0     | 30.706 | 25.853     | 35.559     | 0.751 | 0.675      | 0.827      |
| 72                    | interpolated | 0     | 32.168 | 26.901     | 37.436     | 0.763 | 0.689      | 0.838      |
| 78                    | interpolated | 0     | 33.561 | 27.889     | 39.233     | 0.774 | 0.7        | 0.847      |
| 84                    | interpolated | 0     | 34.896 | 28.828     | 40.963     | 0.782 | 0.709      | 0.856      |
| 90                    | interpolated | 0     | 36.182 | 29.724     | 42.64      | 0.79  | 0.717      | 0.863      |
| 96                    | interpolated | 0     | 37.426 | 30.582     | 44.269     | 0.796 | 0.723      | 0.869      |
| 102                   | interpolated | 0     | 38.633 | 31.407     | 45.86      | 0.802 | 0.729      | 0.875      |
| 108                   | interpolated | 0     | 39.807 | 32.199     | 47.415     | 0.807 | 0.733      | 0.881      |
| 109                   | observed     | 0     | 40     | 32.328     | 47.672     | 0.808 | 0.734      | 0.882      |
| 110                   | extrapolated | 0     | 40.192 | 32.457     | 47.927     | 0.809 | 0.735      | 0.883      |
| 115                   | extrapolated | 0     | 41.138 | 33.085     | 49.191     | 0.813 | 0.738      | 0.888      |

|     |              |   |        |        |        |       |       |       |
|-----|--------------|---|--------|--------|--------|-------|-------|-------|
| 121 | extrapolated | 0 | 42.247 | 33.812 | 50.682 | 0.818 | 0.743 | 0.893 |
| 127 | extrapolated | 0 | 43.327 | 34.509 | 52.145 | 0.823 | 0.747 | 0.899 |
| 132 | extrapolated | 0 | 44.205 | 35.067 | 53.343 | 0.827 | 0.75  | 0.903 |
| 138 | extrapolated | 0 | 45.234 | 35.711 | 54.757 | 0.831 | 0.754 | 0.908 |
| 144 | extrapolated | 0 | 46.236 | 36.327 | 56.145 | 0.836 | 0.758 | 0.913 |
| 149 | extrapolated | 0 | 47.051 | 36.819 | 57.283 | 0.839 | 0.761 | 0.917 |
| 155 | extrapolated | 0 | 48.006 | 37.384 | 58.627 | 0.843 | 0.765 | 0.922 |
| 161 | extrapolated | 0 | 48.935 | 37.923 | 59.948 | 0.847 | 0.769 | 0.926 |
| 166 | extrapolated | 0 | 49.692 | 38.353 | 61.031 | 0.851 | 0.772 | 0.93  |
| 172 | extrapolated | 0 | 50.577 | 38.846 | 62.309 | 0.855 | 0.776 | 0.934 |
| 178 | extrapolated | 0 | 51.44  | 39.314 | 63.566 | 0.858 | 0.779 | 0.938 |
| 183 | extrapolated | 0 | 52.142 | 39.687 | 64.597 | 0.861 | 0.782 | 0.941 |
| 189 | extrapolated | 0 | 52.964 | 40.114 | 65.814 | 0.865 | 0.786 | 0.944 |
| 195 | extrapolated | 0 | 53.765 | 40.518 | 67.011 | 0.869 | 0.789 | 0.948 |
| 200 | extrapolated | 0 | 54.416 | 40.839 | 67.992 | 0.871 | 0.792 | 0.951 |
| 206 | extrapolated | 0 | 55.179 | 41.206 | 69.151 | 0.875 | 0.796 | 0.954 |
| 212 | extrapolated | 0 | 55.922 | 41.553 | 70.29  | 0.878 | 0.799 | 0.957 |
| 218 | extrapolated | 0 | 56.645 | 41.881 | 71.409 | 0.881 | 0.803 | 0.96  |

**d) Grazing  
lands**

| Number of<br>individuals | method       | order | qD     | qD.LC<br>L | qD.UC<br>L | SC    | SC.LC<br>L | SC.U<br>CL |
|--------------------------|--------------|-------|--------|------------|------------|-------|------------|------------|
| 1                        | interpolated | 0     | 1      | 1          | 1          | 0.037 | 0.021      | 0.052      |
| 5                        | interpolated | 0     | 4.653  | 4.524      | 4.783      | 0.165 | 0.109      | 0.22       |
| 10                       | interpolated | 0     | 8.564  | 8.106      | 9.022      | 0.291 | 0.214      | 0.368      |
| 15                       | interpolated | 0     | 11.905 | 11.049     | 12.761     | 0.388 | 0.305      | 0.471      |
| 20                       | interpolated | 0     | 14.806 | 13.541     | 16.071     | 0.463 | 0.381      | 0.546      |
| 25                       | interpolated | 0     | 17.366 | 15.705     | 19.027     | 0.522 | 0.442      | 0.603      |
| 30                       | interpolated | 0     | 19.657 | 17.621     | 21.694     | 0.569 | 0.491      | 0.646      |
| 34                       | interpolated | 0     | 21.335 | 19.014     | 23.656     | 0.599 | 0.524      | 0.675      |
| 39                       | interpolated | 0     | 23.273 | 20.614     | 25.932     | 0.631 | 0.558      | 0.704      |
| 44                       | interpolated | 0     | 25.064 | 22.083     | 28.045     | 0.657 | 0.586      | 0.729      |
| 49                       | interpolated | 0     | 26.732 | 23.443     | 30.02      | 0.68  | 0.609      | 0.75       |
| 54                       | interpolated | 0     | 28.293 | 24.707     | 31.88      | 0.699 | 0.629      | 0.769      |
| 59                       | interpolated | 0     | 29.762 | 25.886     | 33.639     | 0.716 | 0.647      | 0.786      |
| 63                       | interpolated | 0     | 30.877 | 26.772     | 34.982     | 0.729 | 0.66       | 0.799      |
| 68                       | interpolated | 0     | 32.201 | 27.814     | 36.587     | 0.744 | 0.674      | 0.814      |
| 73                       | interpolated | 0     | 33.452 | 28.785     | 38.118     | 0.758 | 0.688      | 0.829      |
| 78                       | interpolated | 0     | 34.633 | 29.687     | 39.58      | 0.772 | 0.7        | 0.843      |
| 83                       | interpolated | 0     | 35.748 | 30.52      | 40.977     | 0.785 | 0.712      | 0.858      |
| 88                       | interpolated | 0     | 36.798 | 31.284     | 42.312     | 0.798 | 0.723      | 0.872      |
| 89                       | observed     | 0     | 37     | 31.428     | 42.572     | 0.8   | 0.725      | 0.875      |



|     |              |   |        |        |        |       |       |       |
|-----|--------------|---|--------|--------|--------|-------|-------|-------|
| 90  | extrapolated | 0 | 37.2   | 31.57  | 42.83  | 0.803 | 0.727 | 0.878 |
| 94  | extrapolated | 0 | 37.974 | 32.11  | 43.838 | 0.812 | 0.736 | 0.889 |
| 99  | extrapolated | 0 | 38.889 | 32.727 | 45.051 | 0.824 | 0.746 | 0.902 |
| 103 | extrapolated | 0 | 39.58  | 33.175 | 45.986 | 0.832 | 0.753 | 0.912 |
| 108 | extrapolated | 0 | 40.398 | 33.683 | 47.112 | 0.843 | 0.762 | 0.923 |
| 113 | extrapolated | 0 | 41.165 | 34.136 | 48.194 | 0.852 | 0.771 | 0.933 |
| 117 | extrapolated | 0 | 41.745 | 34.46  | 49.03  | 0.859 | 0.778 | 0.941 |
| 122 | extrapolated | 0 | 42.431 | 34.821 | 50.04  | 0.868 | 0.786 | 0.95  |
| 127 | extrapolated | 0 | 43.074 | 35.137 | 51.012 | 0.876 | 0.794 | 0.958 |
| 131 | extrapolated | 0 | 43.561 | 35.359 | 51.763 | 0.882 | 0.8   | 0.964 |
| 136 | extrapolated | 0 | 44.136 | 35.601 | 52.671 | 0.889 | 0.807 | 0.971 |
| 140 | extrapolated | 0 | 44.571 | 35.768 | 53.374 | 0.895 | 0.813 | 0.976 |
| 145 | extrapolated | 0 | 45.085 | 35.946 | 54.223 | 0.901 | 0.82  | 0.982 |
| 150 | extrapolated | 0 | 45.567 | 36.092 | 55.042 | 0.907 | 0.827 | 0.988 |
| 154 | extrapolated | 0 | 45.932 | 36.188 | 55.676 | 0.912 | 0.832 | 0.992 |
| 159 | extrapolated | 0 | 46.363 | 36.283 | 56.442 | 0.917 | 0.838 | 0.996 |
| 164 | extrapolated | 0 | 46.767 | 36.354 | 57.181 | 0.922 | 0.844 | 1     |
| 168 | extrapolated | 0 | 47.073 | 36.394 | 57.753 | 0.926 | 0.848 | 1.003 |
| 173 | extrapolated | 0 | 47.435 | 36.425 | 58.445 | 0.93  | 0.854 | 1.007 |
| 178 | extrapolated | 0 | 47.774 | 36.437 | 59.112 | 0.935 | 0.859 | 1.01  |

| e) Town               |              |       |        |            |            |       |            |            |
|-----------------------|--------------|-------|--------|------------|------------|-------|------------|------------|
| Number of individuals | method       | order | qD     | qD.LC<br>L | qD.UC<br>L | SC    | SC.LC<br>L | SC.U<br>CL |
| 1                     | interpolated | 0     | 1      | 1          | 1          | 0.279 | 0.201      | 0.356      |
| 6                     | interpolated | 0     | 3.369  | 2.879      | 3.859      | 0.721 | 0.626      | 0.815      |
| 11                    | interpolated | 0     | 4.595  | 3.694      | 5.495      | 0.788 | 0.715      | 0.86       |
| 17                    | interpolated | 0     | 5.786  | 4.503      | 7.068      | 0.818 | 0.757      | 0.878      |
| 22                    | interpolated | 0     | 6.66   | 5.109      | 8.212      | 0.836 | 0.781      | 0.89       |
| 27                    | interpolated | 0     | 7.451  | 5.66       | 9.242      | 0.851 | 0.8        | 0.902      |
| 33                    | interpolated | 0     | 8.305  | 6.253      | 10.357     | 0.867 | 0.819      | 0.914      |
| 38                    | interpolated | 0     | 8.949  | 6.696      | 11.202     | 0.878 | 0.832      | 0.923      |
| 43                    | interpolated | 0     | 9.541  | 7.098      | 11.983     | 0.887 | 0.843      | 0.931      |
| 49                    | interpolated | 0     | 10.191 | 7.532      | 12.85      | 0.897 | 0.855      | 0.94       |
| 54                    | interpolated | 0     | 10.69  | 7.859      | 13.521     | 0.904 | 0.863      | 0.946      |
| 59                    | interpolated | 0     | 11.154 | 8.157      | 14.152     | 0.911 | 0.87       | 0.951      |
| 65                    | interpolated | 0     | 11.673 | 8.482      | 14.865     | 0.917 | 0.877      | 0.957      |
| 70                    | interpolated | 0     | 12.078 | 8.729      | 15.426     | 0.922 | 0.883      | 0.961      |
| 75                    | interpolated | 0     | 12.46  | 8.958      | 15.961     | 0.926 | 0.887      | 0.965      |
| 81                    | interpolated | 0     | 12.892 | 9.211      | 16.574     | 0.93  | 0.891      | 0.969      |
| 86                    | interpolated | 0     | 13.235 | 9.406      | 17.063     | 0.933 | 0.894      | 0.972      |
| 91                    | interpolated | 0     | 13.562 | 9.589      | 17.535     | 0.936 | 0.897      | 0.975      |
| 97                    | interpolated | 0     | 13.939 | 9.794      | 18.083     | 0.939 | 0.899      | 0.979      |

|     |              |   |        |        |        |       |       |       |
|-----|--------------|---|--------|--------|--------|-------|-------|-------|
| 98  | observed     | 0 | 14     | 9.827  | 18.173 | 0.939 | 0.899 | 0.979 |
| 99  | extrapolated | 0 | 14.061 | 9.86   | 18.262 | 0.94  | 0.9   | 0.98  |
| 104 | extrapolated | 0 | 14.359 | 10.017 | 18.7   | 0.942 | 0.901 | 0.982 |
| 109 | extrapolated | 0 | 14.647 | 10.164 | 19.129 | 0.944 | 0.903 | 0.984 |
| 114 | extrapolated | 0 | 14.925 | 10.302 | 19.548 | 0.946 | 0.905 | 0.986 |
| 119 | extrapolated | 0 | 15.193 | 10.43  | 19.957 | 0.947 | 0.906 | 0.988 |
| 124 | extrapolated | 0 | 15.453 | 10.548 | 20.359 | 0.949 | 0.908 | 0.99  |
| 129 | extrapolated | 0 | 15.704 | 10.657 | 20.751 | 0.951 | 0.91  | 0.992 |
| 134 | extrapolated | 0 | 15.947 | 10.757 | 21.136 | 0.952 | 0.912 | 0.993 |
| 139 | extrapolated | 0 | 16.181 | 10.848 | 21.514 | 0.954 | 0.914 | 0.995 |
| 144 | extrapolated | 0 | 16.408 | 10.932 | 21.883 | 0.956 | 0.915 | 0.996 |
| 150 | extrapolated | 0 | 16.669 | 11.021 | 22.317 | 0.957 | 0.917 | 0.997 |
| 155 | extrapolated | 0 | 16.879 | 11.087 | 22.671 | 0.959 | 0.919 | 0.998 |
| 160 | extrapolated | 0 | 17.082 | 11.147 | 23.018 | 0.96  | 0.921 | 1     |
| 165 | extrapolated | 0 | 17.278 | 11.199 | 23.358 | 0.962 | 0.923 | 1.001 |
| 170 | extrapolated | 0 | 17.468 | 11.245 | 23.691 | 0.963 | 0.924 | 1.002 |
| 175 | extrapolated | 0 | 17.651 | 11.284 | 24.018 | 0.964 | 0.926 | 1.003 |
| 180 | extrapolated | 0 | 17.828 | 11.318 | 24.338 | 0.965 | 0.927 | 1.003 |
| 185 | extrapolated | 0 | 17.999 | 11.346 | 24.652 | 0.966 | 0.929 | 1.004 |
| 190 | extrapolated | 0 | 18.164 | 11.369 | 24.959 | 0.968 | 0.93  | 1.005 |
| 196 | extrapolated | 0 | 18.355 | 11.39  | 25.32  | 0.969 | 0.932 | 1.006 |

---
